# Supplementary material for: Simultaneous magneto-dielectric transitions in a fluorescent Hofmann-type coordination polymer
Source: Royal Society of Chemistry journal article supplement (doi:10.1039/d3dt03186a), 2023-01-01
Supplement: d3dt03186a1.pdf [file d3dt03186a1.pdf]

## Supplementary Materials

### Simultaneous Magneto-dielectric Transition in a Fluorescent Hofmann-type Coordination Polymer

Fei-Fei Yan,<sup>a</sup> Dan Liu,<sup>a</sup> Rui Cai,<sup>b</sup> Liang Zhao,<sup>a</sup> Pan-Dong Mao,<sup>a</sup> Hui-Ying Sun,<sup>a</sup> Yin-Shan Meng,<sup>\*a</sup>  
and Tao Liu<sup>\*a</sup>

<sup>a</sup>*State Key Laboratory of Fine Chemicals, Dalian University of Technology, Dalian, 116024, China.*

<sup>b</sup>*Instrumental Analysis Center, Dalian University of Technology, Dalian, 116024, China.*

\*Corresponding author. Email: [mengys@dlut.edu.cn](mailto:mengys@dlut.edu.cn) (Y.-S. Meng), [liutao@dlut.edu.cn](mailto:liutao@dlut.edu.cn) (T. Liu)

## Contents

|                                                                                                                                                                                                           |           |
|-----------------------------------------------------------------------------------------------------------------------------------------------------------------------------------------------------------|-----------|
| <b>Experimental Section</b> .....                                                                                                                                                                         | <b>2</b>  |
| <b>Table S1.</b> Selected bond lengths (Å) and bond angles (°) for <b>1</b> at 120 K and 298 K.....                                                                                                       | <b>3</b>  |
| <b>Table S2.</b> Average Fe1–N bond lengths (Å) for <b>1</b> at 120 and 298 K.....                                                                                                                        | <b>5</b>  |
| <b>Table S3.</b> Mössbauer spectra parameters for <b>1</b> at 40 K. ....                                                                                                                                  | <b>5</b>  |
| <b>Table S4.</b> The dielectric constant changes $\Delta\epsilon'$ in the SCO compounds in the previous papers.                                                                                           | <b>6</b>  |
| <b>Table S5.</b> SHAPE analysis of Fe <sup>II</sup> in compound <b>1</b> at 120 K and 298 K. ....                                                                                                         | <b>7</b>  |
| <b>Figure S1.</b> Thermo-gravimetric analysis curve for compound <b>1</b> and <b>1-de</b> in the nitrogen atmosphere with the sweeping rate of 10 K min <sup>-1</sup> . ....                              | <b>8</b>  |
| <b>Figure S2.</b> Powder X-ray diffraction data for compound <b>1</b> at room temperature.....                                                                                                            | <b>8</b>  |
| <b>Figure S3.</b> The interlayer short-contact interactions between DPPE ligands with the distances of 2.898 Å, 2.820 Å and 2.781 Å at 298 K and 2.828 Å, 2.750 Å and 2.613 Å at 120 K.....               | <b>9</b>  |
| <b>Figure S4.</b> The Fe···Fe distances with the distances of 10.323, 10.356 Å at 120 K and 10.594, 10.591 Å at 298 K in <b>1</b> .....                                                                   | <b>9</b>  |
| <b>Figure S5.</b> Scan rate study of temperature-dependent susceptibilities of compound <b>1</b> under the scan rates of 0.5, 1, 4, and 6 K min <sup>-1</sup> over the temperature range of 20–350 K..... | <b>10</b> |
| <b>Figure S6.</b> The Mössbauer spectra for <b>1</b> at 40 K. ....                                                                                                                                        | <b>11</b> |
| <b>Figure S7.</b> UV-vis spectrum (a) and fluorescence emission spectrum (b) of DPPE in solid at room temperature. ....                                                                                   | <b>12</b> |
| <b>Figure S8.</b> Temperature-dependent UV-vis spectra of <b>1</b> in a solid from 100 to 340 K in heating mode. ....                                                                                     | <b>13</b> |
| <b>Figure S9.</b> Luminescence decays of DPPE ligand and compound <b>1</b> in the solid at room temperature. The red line represented the fitting result. ....                                            | <b>14</b> |
| <b>Figure S10.</b> Temperature-dependent imaginary part of dielectric constants for <b>1</b> . ....                                                                                                       | <b>15</b> |
| <b>Figure S11.</b> Temperature-dependent $\chi_M T$ products (cyan line) under the 1 kOe dc field and temperature-dependent dielectric constants (red line) at 1000 kHz for <b>1</b> .....                | <b>16</b> |
| <b>Figure S12.</b> The overlapped diagram of molecular structures for <b>1</b> at 120 (green) and 298 K (red). Hydrogen atoms and solvent molecules were omitted for clarity.....                         | <b>17</b> |
| <b>References</b> .....                                                                                                                                                                                   | <b>18</b> |

## Experimental Section

### Materials.

All chemical reagents were commercially available and used without further purification. The TPE-based ligand DPPE was prepared according to published literature.<sup>[1]</sup>

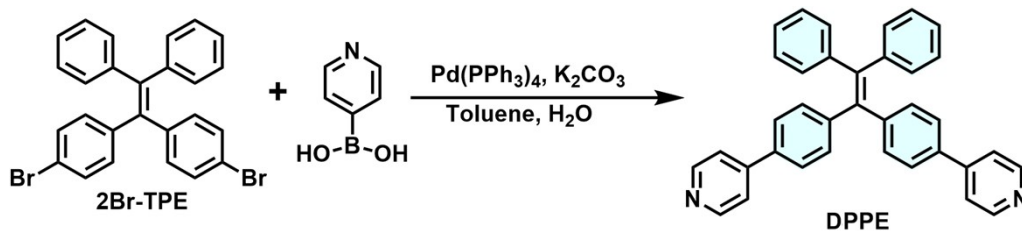

Scheme S1

**Table S1.** Selected bond lengths (Å) and bond angles (°) for **1** at 120 K and 298 K.

| <b>Compound 1</b> <sup>120 K</sup>   |           |                                      |           |
|--------------------------------------|-----------|--------------------------------------|-----------|
| Bond length (Å)                      |           |                                      |           |
| Fe1–N1                               | 2.022(4)  | Fe1–N1 <sup>2</sup>                  | 2.022(4)  |
| Fe1–N2                               | 1.977(7)  | Fe1–N3                               | 1.953(5)  |
| Fe1–N3 <sup>2</sup>                  | 1.953(5)  | Fe1–N4 <sup>3</sup>                  | 1.980(7)  |
| Ag1–C1                               | 2.072(8)  | Ag1–C1 <sup>1</sup>                  | 2.072(8)  |
| Ag2–C2                               | 2.054(8)  | Ag2–C3                               | 2.063(8)  |
| Bond angle (°)                       |           |                                      |           |
| N3 <sup>2</sup> –Fe1–N3              | 179.5(3)  | N3 <sup>2</sup> –Fe1–N2              | 89.76(13) |
| N3–Fe1–N2                            | 89.76(13) | N3–Fe1–N1                            | 89.79(19) |
| N3 <sup>2</sup> –Fe1–N1 <sup>2</sup> | 89.80(19) | N3–Fe1–N1 <sup>2</sup>               | 90.22(19) |
| N3 <sup>2</sup> –Fe1–N1              | 90.21(19) | N3 <sup>2</sup> –Fe1–N4 <sup>3</sup> | 90.24(13) |
| N3–Fe1–N4 <sup>3</sup>               | 90.24(13) | N2–Fe1–N1 <sup>2</sup>               | 90.96(12) |
| N2–Fe1–N1                            | 90.96(12) | N2–Fe1–N4 <sup>3</sup>               | 180.0     |
| N1–Fe1–N1 <sup>2</sup>               | 178.1(2)  | N4 <sup>3</sup> –Fe1–N1              | 89.04(12) |
| N4 <sup>3</sup> –Fe1–N1 <sup>2</sup> | 89.04(12) | C1 <sup>1</sup> –Ag1–C1              | 180.00(6) |
| C2–Ag2–C3                            | 180.0     |                                      |           |

Symmetry transformations used to generate equivalent atoms: <sup>1</sup>1-X,1-Y,2-Z; <sup>2</sup>1-X,+Y,3/2-Z; <sup>3</sup>+X,-1+Y,+Z

---

**Compound 1**<sup>298 K</sup>

---

## Bond length (Å)

|                     |           |                     |           |
|---------------------|-----------|---------------------|-----------|
| Fe1–N1              | 2.206(6)  | Fe1–N1 <sup>2</sup> | 2.206(6)  |
| Fe1–N2              | 2.110(8)  | Fe1–N3              | 2.075(9)  |
| Fe1–N3 <sup>2</sup> | 2.075(9)  | Fe1–N4 <sup>3</sup> | 2.140(9)  |
| Ag1–C1              | 1.966(12) | Ag1–C1 <sup>1</sup> | 1.966(12) |
| Ag2–C2              | 2.045(13) | Ag2–C3              | 2.042(13) |

## Bond angle (°)

|                                      |           |                                      |           |
|--------------------------------------|-----------|--------------------------------------|-----------|
| N1–Fe1–N1 <sup>2</sup>               | 177.8(3)  | N2–Fe1–N1 <sup>2</sup>               | 91.11(16) |
| N2–Fe1–N1                            | 91.11(15) | N2–Fe1–N4 <sup>3</sup>               | 180.0     |
| N3 <sup>2</sup> –Fe1–N1 <sup>2</sup> | 90.0(3)   | N3 <sup>2</sup> –Fe1–N1              | 90.0(3)   |
| N3–Fe1–N1                            | 90.0(3)   | N3–Fe1–N1 <sup>2</sup>               | 90.0(3)   |
| N3–Fe1–N2                            | 89.0(2)   | N3 <sup>2</sup> –Fe1–N2              | 89.0(2)   |
| N3 <sup>2</sup> –Fe1–N3              | 178.0(4)  | N3–Fe1–N4 <sup>3</sup>               | 91.0(2)   |
| N3 <sup>2</sup> –Fe1–N4 <sup>3</sup> | 91.0(2)   | N4 <sup>3</sup> –Fe1–N1 <sup>2</sup> | 88.89(15) |
| N4 <sup>3</sup> –Fe1–N1              | 88.89(16) | C1–Ag1–C1 <sup>1</sup>               | 180.0     |
| C3–Ag2–C2                            | 180.0     |                                      |           |

---

Symmetry transformations used to generate equivalent atoms: <sup>1</sup>2-X,1-Y,2-Z; <sup>2</sup>2-X, +Y,3/2-Z;<sup>3</sup>+X,-1+Y,+Z

**Table S2.** Average Fe1–N bond lengths (Å) for **1** at 120 and 298 K.

| <b>1</b>                 | 298 K    | 120 K    |
|--------------------------|----------|----------|
| Fe1-N1                   | 2.206(6) | 2.022(4) |
| Fe1-N2                   | 2.110(8) | 1.977(7) |
| Fe1-N3                   | 2.075(9) | 1.953(5) |
| Fe1-N4                   | 2.140(9) | 1.980(7) |
| Fe1-N <sub>average</sub> | 2.132(7) | 1.983(1) |

**Table S3.** Mössbauer spectra parameters for **1** at 40 K.

| <i>T</i> | $\delta$           | $\Delta E_Q$       | Relative area |                                |
|----------|--------------------|--------------------|---------------|--------------------------------|
| (K)      | mm s <sup>-1</sup> | mm s <sup>-1</sup> | %             | Fe type                        |
| 40 K     | 1.08               | 2.10               | 19            | Fe <sub>HS</sub> <sup>II</sup> |
|          | 0.39               | 0.16               | 81            | Fe <sub>LS</sub> <sup>II</sup> |

**Table S4.** The dielectric constant changes  $\Delta\varepsilon'$  in the SCO compounds in the previous papers.

| Year      | Complex                                                                                                           | Frequency | $\Delta\varepsilon' =  \varepsilon'_{HS} - \varepsilon'_{LS} $ | Ref              |
|-----------|-------------------------------------------------------------------------------------------------------------------|-----------|----------------------------------------------------------------|------------------|
|           | $[\text{Fe}_{0.85}\text{Zn}_{0.15}(\text{NH}_2\text{trz})_3](\text{NO}_3)_2$                                      |           | 0.008                                                          |                  |
| 2003      | $\text{Fe}(\text{phen})_2(\text{NCS})_2$                                                                          | 10 kHz    | 0.015                                                          | 1 <sup>[2]</sup> |
|           | $\text{Fe}(\text{bt})_2(\text{NCS})_2$                                                                            |           | 0.15                                                           |                  |
|           | $\text{Fe}_{0.8}\text{Ni}_{0.2}(\text{btr})_2(\text{NCS})_2 \cdot \text{H}_2\text{O}$                             |           | 0.03                                                           |                  |
| 2006      | $[\text{Fe}(\text{L})(\text{CN})_2] \cdot \text{H}_2\text{O}$                                                     | 100 kHz   | 0.18                                                           | 2 <sup>[3]</sup> |
| 2017      | $\text{Fe}(\text{R-L}^1)(\text{bpz})_2$                                                                           | 1000 kHz  | 0.58                                                           | 3 <sup>[4]</sup> |
|           | $\text{Fe}(\text{S-L}^1)(\text{bpz})_2$                                                                           | 1000 kHz  | 0.46                                                           |                  |
| 2018      | $[(\text{Tp})\text{Fe}^{\text{III}}(\text{CN})_3]_2[\text{Fe}^{\text{II}}(\text{azp})] \cdot 4\text{H}_2\text{O}$ | 1000 kHz  | 1.1                                                            | 4 <sup>[5]</sup> |
| 2020      | $[\text{Fe}^{\text{II}}(\text{L})(\text{bpy})]_n$                                                                 | 0.5 kHz   | ~9                                                             | 5 <sup>[6]</sup> |
|           |                                                                                                                   | 1000 kHz  | ~0.9                                                           |                  |
| 2022      | $[\text{Fe}^{\text{II}}(\text{dpa})][(\text{pzTp})\text{Fe}^{\text{III}}(\text{CN})_3]_2$                         | 1000 kHz  | 2.3                                                            | 6 <sup>[7]</sup> |
| 2022      | $\{\text{Fe}(\text{bpt})[\text{Pt}(\text{CN})_4]\} \cdot 0.5\text{anth}$                                          | 100 kHz   | ~2.5                                                           | 7 <sup>[8]</sup> |
| This work | $\{\text{Fe}(\text{DPPE})_2[\text{Ag}(\text{CN})_2]_2\} \cdot 2\text{EtOH}$                                       | 0.5 kHz   | 1.2                                                            |                  |
|           |                                                                                                                   | 1000 kHz  | 0.9                                                            |                  |

**Table S5.** SHAPE analysis of Fe<sup>II</sup> in compound **1** at 120 K and 298 K.

HP ( $D_{6h}$ ): Hexagon; PPY ( $C_{5v}$ ): Pentagonal pyramid; OC( $O_h$ ): Octahedron; TPR ( $D_{3h}$ ): Trigonal prism; JPPY ( $C_{5v}$ ): Johnson pentagonal pyramid J2.

| Compound <b>1</b> |              |              |           |              |              |
|-------------------|--------------|--------------|-----------|--------------|--------------|
|                   | HP           | PPY          | OC        | TPR          | JPPY         |
|                   | ( $D_{6h}$ ) | ( $C_{5v}$ ) | ( $O_h$ ) | ( $C_{3h}$ ) | ( $C_{5v}$ ) |
| 298 K             | 33.353       | 29.223       | 0.091     | 16.194       | 32.581       |
| 120 K             | 33.256       | 29.76        | 0.029     | 16.395       | 33.212       |



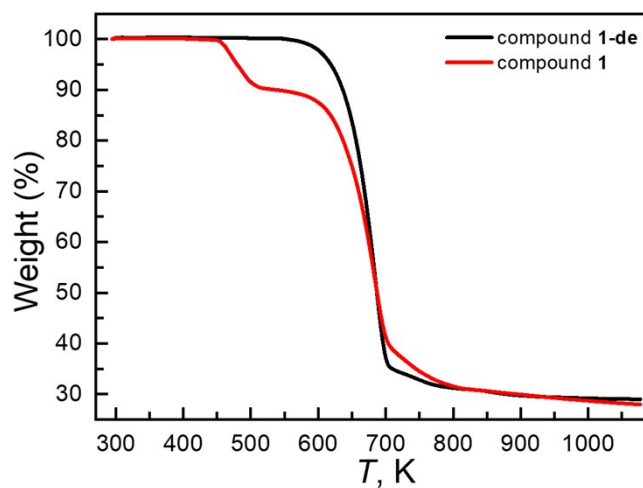

**Figure S1.** Thermo-gravimetric analysis curve for compound **1** and **1-de** in the nitrogen atmosphere with the sweeping rate of  $10 \text{ K min}^{-1}$ .

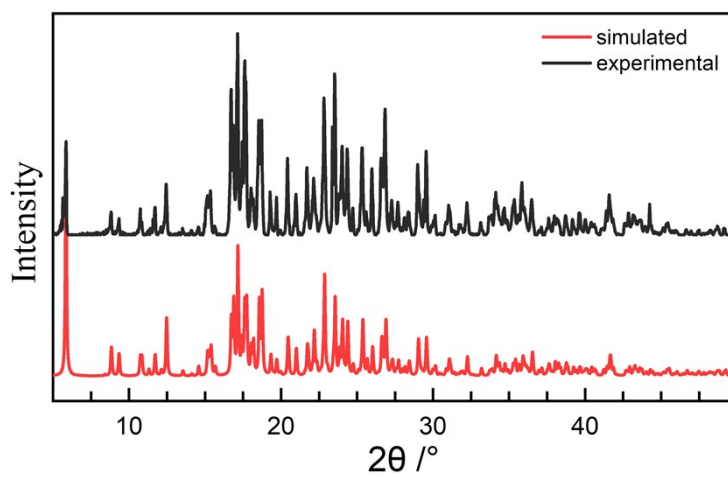

**Figure S2.** Powder X-ray diffraction data for compound **1** at room temperature.

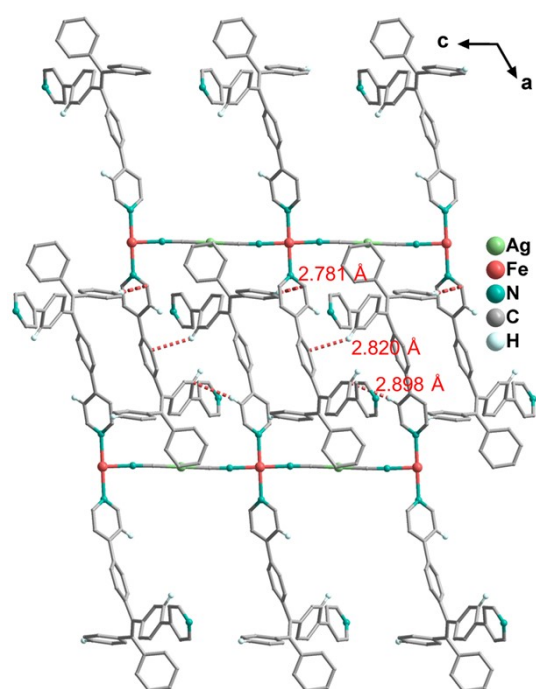

**Figure S3.** The interlayer short-contact interactions between DPPE ligands with the distances of 2.898 Å, 2.820 Å and 2.781 Å at 298 K and 2.828 Å, 2.750 Å and 2.613 Å at 120 K.

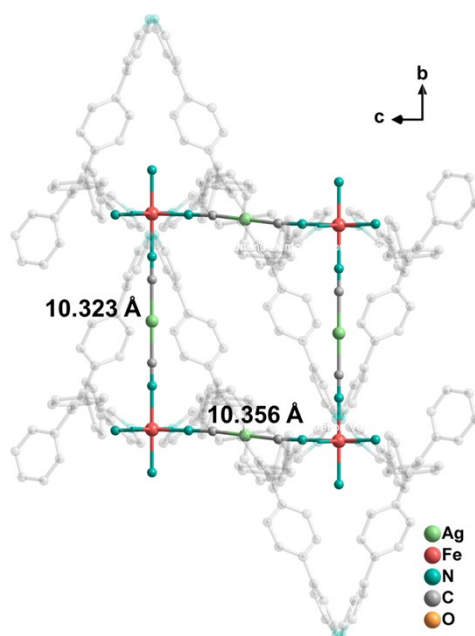

**Figure S4.** The Fe...Fe distances with the distances of 10.323, 10.356 Å at 120 K and 10.594, 10.591 Å at 298 K in **1**.

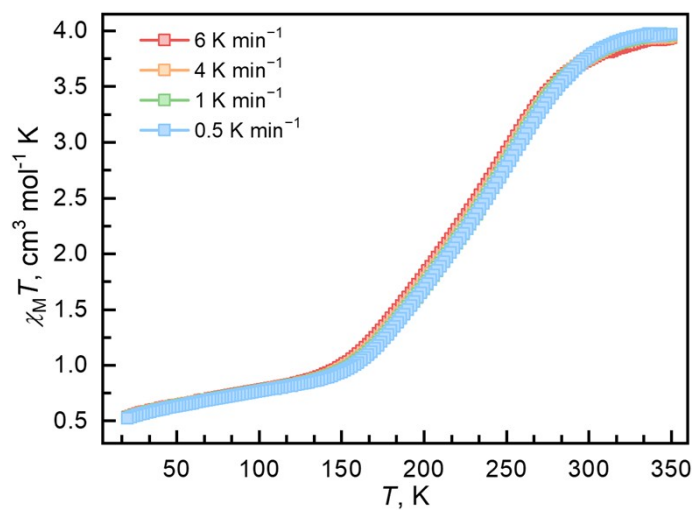

**Figure S5.** Scan rate study of temperature-dependent susceptibilities of compound **1** under the scan rates of 0.5, 1, 4, and 6 K min<sup>-1</sup> over the temperature range of 20–350 K.

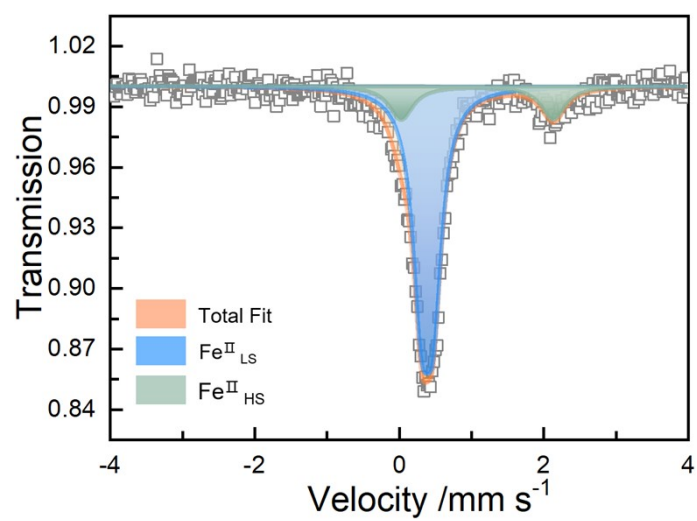

**Figure S6.** The Mössbauer spectra for **1** at 40 K.

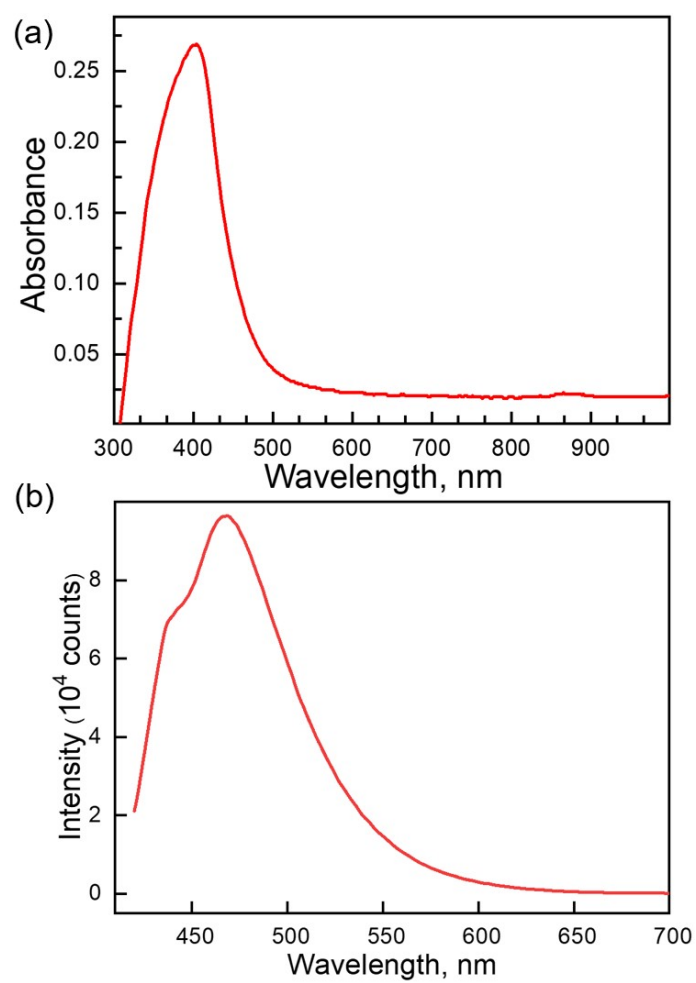

**Figure S7.** UV-vis spectrum (a) and fluorescence emission spectrum (b) of DPPE in solid at room temperature.

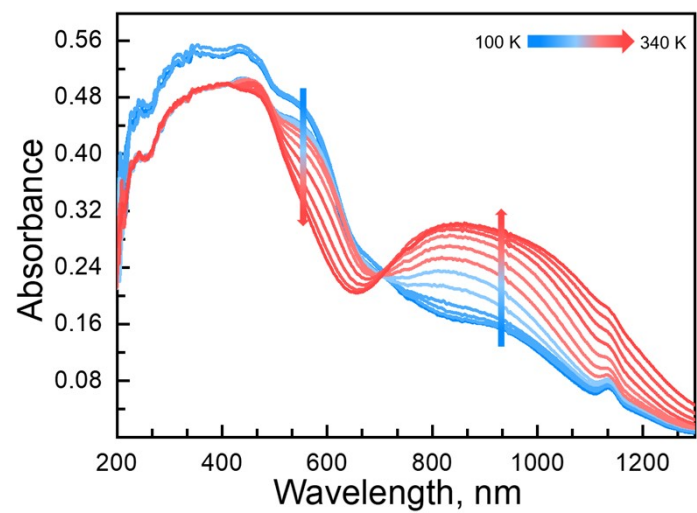

**Figure S8.** Temperature-dependent UV-vis spectra of **1** in a solid from 100 to 340 K in heating mode.

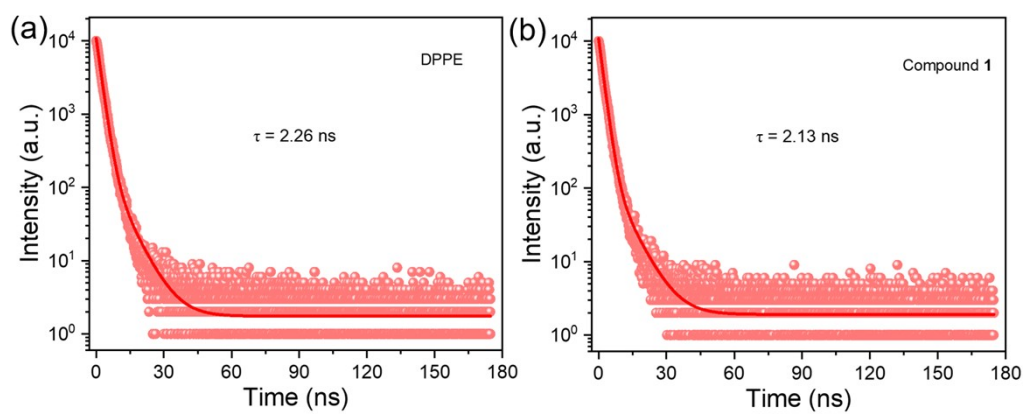

**Figure S9.** Luminescence decays of DPPE ligand and compound **1** in the solid at room temperature. The red line represented the fitting result.

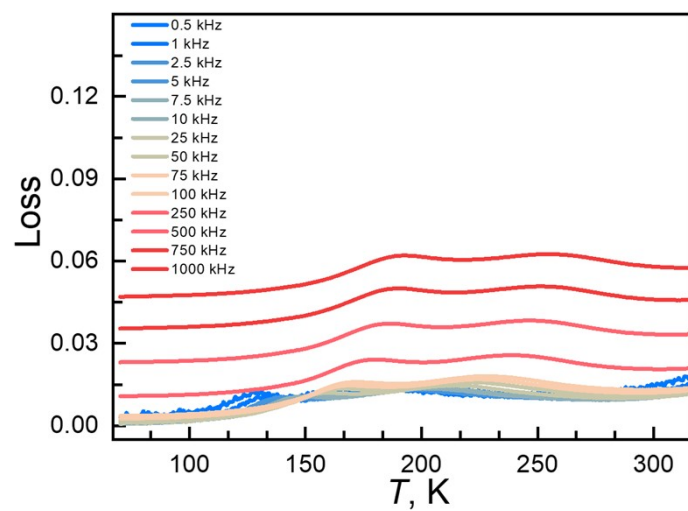

**Figure S10.** Temperature-dependent imaginary part of dielectric constants for **1**.



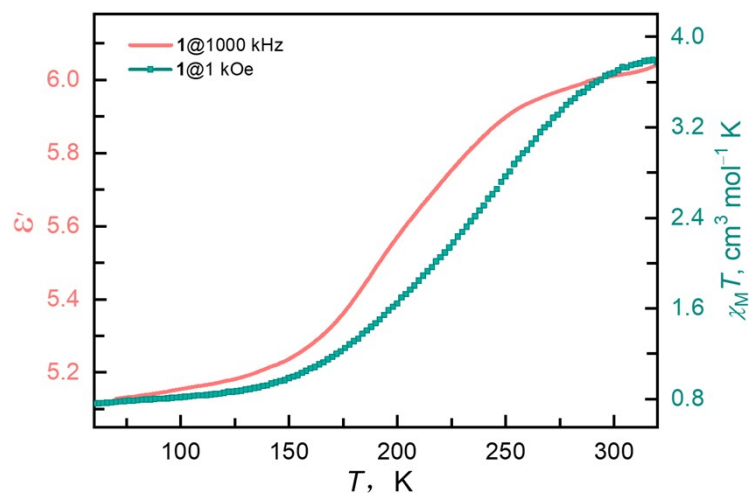

**Figure S11.** Temperature-dependent  $\chi_M T$  products (cyan line) under the 1 kOe dc field and temperature-dependent dielectric constants (red line) at 1000 kHz for **1**.

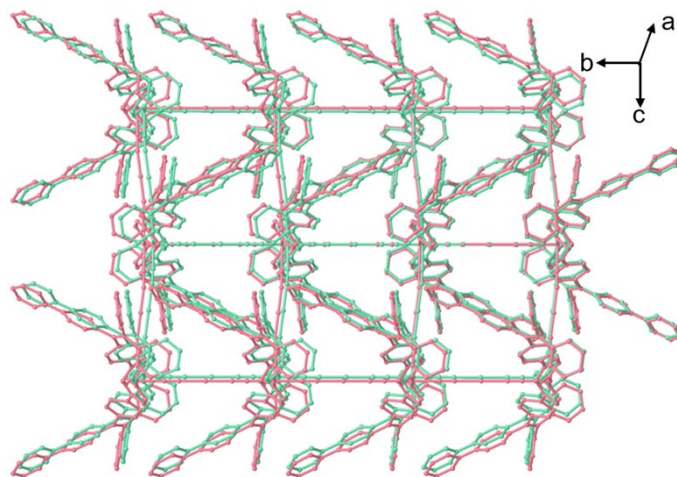

**Figure S12.** The overlapped diagram of molecular structures for **1** at 120 (green) and 298 K (red). Hydrogen atoms and solvent molecules were omitted for clarity.

## References

- [1] H. Ma, M. Yang, C. Zhang, Y. Ma, Y. Qin, Z. Lei, L. Chang, L. Lei, T. Wang and Y. Yang, *J. Mater. Chem. B*, 2017, **5**, 8525.
- [2] A. Bousseksou, G. Molnár, P. Demont and J. Menegotto, *J. Mater. Chem.*, 2003, **13**, 2069–2071.
- [3] S. Bonhommeau, T. Guillon, L. M. Lawson Daku, P. Demont, J. Sanchez Costa, J.-F. Létard, G. Molnár and A. Bousseksou, *Angew. Chem. Int. Ed.*, 2006, **45**, 1625–1629.
- [4] J. Ru, F. Yu, P.-P. Shi, C.-Q. Jiao, C.-H. Li, R.-G. Xiong, T. Liu, M. Kurmoo and J.-L. Zuo, *Eur. J. Inorg. Chem.*, 2017, **2017**, 3144–3149.
- [5] H. Zheng, Y.-S. Meng, G.-L. Zhou, C.-Y. Duan, O. Sato, S. Hayami, Y. Luo and T. Liu, *Angew. Chem. Int. Ed.*, 2018, **57**, 8468–8472.
- [6] Y.-R. Qiu, L. Cui, P.-Y. Cai, F. Yu, M. Kurmoo, C. F. Leong, D. M. D'Alessandro and J.-L. Zuo, *Chem. Sci.*, 2020, **11**, 6229.
- [7] W. Wen, Q. Liu, S.-H. Zhang, N.-T. Yao, H. Oshio, Y.-S. Meng and T. Liu, *Angew. Chem. Int. Ed.*, 2022, **61**, e202208886.
- [8] N.-T. Yao, L. Zhao, H.-Y. Sun, C. Yi, Y.-H. Guan, Y.-M. Li, H. Oshio, Y.-S. Meng and T. Liu, *Angew. Chem. Int. Ed.*, 2022, **61**, e202208208.
